# Supplementary material
Source: PubMed Central journal article supplement (PMC3826958)
Supplement: NIHMS455317-supplement-supplemental_table_1.pdf [file NIHMS455317-supplement-supplemental_table_1.pdf]

**Supplemental Table 1. List of cysteines in the control protein set used to test the electrostatic cysteine parameters.**

| PDB ID | Protein Name                                                           | Calculated pK <sub>a</sub> | Residue |
|--------|------------------------------------------------------------------------|----------------------------|---------|
| 1BOR   | replication protein a                                                  | 2.27                       | Cys43   |
| 1DFE   | ribosomal protein l36                                                  | 4.175                      | Cys14   |
| 1FRE   | nuclear factor xnf7                                                    | 4.233                      | Cys28   |
| 1FRE   | nuclear factor xnf7                                                    | 4.512                      | Cys6    |
| 1CHC   | c3hc4 domain                                                           | 4.901                      | Cys43   |
| 1PTQ   | protein kinase c delta cys2 domain                                     | 4.932                      | Cys261  |
| 1PTQ   | protein kinase c delta cys2 domain                                     | 4.954                      | Cys272  |
| 1PTQ   | protein kinase c delta cys2 domain                                     | 5.077                      | Cys244  |
| 1IBY   | red copper protein nitrosocyanin                                       | 5.082                      | Cys95   |
| 1PLC   | poplar plastocyanin                                                    | 5.526                      | Cys84   |
| 1HFI   | factor h                                                               | 5.774                      | Cys5    |
| 1CC8   | atx1 metallochaperone protein                                          | 6.087                      | Cys18   |
| 1PTQ   | protein kinase c delta cys2 domain                                     | 6.132                      | Cys247  |
| 1UTG   | uteroglobin                                                            | 6.434                      | Cys3    |
| 1HDP   | human b-cell transcription factor oct-2                                | 6.478                      | Cys50   |
| 1VFY   | phosphatidylinositol-3-phosphate binding fyve domain of vps27p protein | 6.488                      | Cys192  |
| 1D3B   | d3b subcomplex of the human core snrnp domain                          | 6.554                      | Cys66   |
| 1F9F   | regulatory protein e2                                                  | 6.568                      | Cys301  |
| 1FS1   | cyclin a/cdk2-associated p19                                           | 6.595                      | Cys136  |
| 1FS1   | cyclin a/cdk2-associated p45                                           | 6.595                      | Cys136  |
| 1VFY   | phosphatidylinositol-3-phosphate binding fyve domain of vps27p protein | 6.607                      | Cys179  |
| 1E9K   | camp-specific phosphodiesterase, pde4d5                                | 6.628                      | Cys9    |
| 1BOR   | replication protein a                                                  | 6.647                      | Cys18   |
| 1BOR   | replication protein a                                                  | 6.661                      | Cys12   |
| 1EOQ   | gag polyprotein capsid protein p27                                     | 6.816                      | Cys192  |
| 2FDN   | ferredoxin                                                             | 6.823                      | Cys8    |
| 1IRS   | vav proto-oncogene                                                     | 6.863                      | Cys214  |
| 1B0Y   | mutant h42q high-potential iron protein                                | 6.926                      | Cys77   |
| 1JFI   | nc2-tbp-dna ternary complex                                            | 6.927                      | Cys54   |
| 1PTQ   | protein kinase c delta cys2 domain                                     | 6.928                      | Cys280  |
| 1CNO   | cytochrome c552                                                        | 6.944                      | Cys14   |
| 1DFE   | ribosomal protein l36                                                  | 7.023                      | Cys11   |
| 1VPC   | vpr protein                                                            | 7.083                      | Cys76   |
| 1QGW   | cryptophyten phycoerythrin (alpha-1 chain)                             | 7.098                      | Cys19   |

|      |                                                                         |       |        |
|------|-------------------------------------------------------------------------|-------|--------|
| 1QGW | cryptophyten phycoerythrin (alpha-2 chain)                              | 7.098 | Cys19  |
| 1BH9 | tafi18                                                                  | 7.159 | Cys38  |
| 1CC8 | atx1 metallochaperone protein                                           | 7.166 | Cys15  |
| 1BH8 | tafi 28                                                                 | 7.18  | Cys38  |
| 1CHC | c3hc4 domain                                                            | 7.203 | Cys46  |
| 2FDN | ferredoxin                                                              | 7.257 | Cys37  |
| 1HZE | riboflavin synthase                                                     | 7.271 | Cys48  |
| 1J75 | tumor stroma and activated macrophage protein dlm-1                     | 7.283 | Cys138 |
| 1NOB | fiber knob protein                                                      | 7.312 | Cys433 |
| 1TIT | titin, i27                                                              | 7.327 | Cys47  |
| 2FDN | ferredoxin                                                              | 7.34  | Cys18  |
| 1C75 | pf3 single-stranded dna binding protein                                 | 7.426 | Cys35  |
| 1IRS | vav proto-oncogene                                                      | 7.429 | Cys186 |
| 1FS1 | cyclin a/cdk2-associated p19                                            | 7.435 | Cys125 |
| 1FS1 | c cyclin a/cdk2-associated p45                                          | 7.435 | Cys125 |
| 2FDN | ferredoxin                                                              | 7.457 | Cys47  |
| 1NOB | fiber knob protein                                                      | 7.485 | Cys579 |
| 1DXG | desulforedoxin                                                          | 7.496 | Cys28  |
| 1DI2 | double stranded rna binding protein a                                   | 7.529 | Cys149 |
| 1VFY | phosphatidylinositol-3-phosphate binding (fyve domain of protein vps27) | 7.542 | Cys200 |
| 1CNO | cytochrome c552                                                         | 7.561 | Cys17  |
| 1VIE | dihydrofolate reductase                                                 | 7.582 | Cys47  |
| 1K5J | nucleoplasmin core                                                      | 7.67  | Cys51  |
| 2FDN | ferredoxin                                                              | 7.675 | Cys40  |
| 1D2Z | ferredoxin                                                              | 7.707 | Cys46  |
| 2FDN | ferredoxin bottom of form                                               | 7.707 | Cys11  |
| 1UTG | uteroglobin                                                             | 7.759 | Cys69  |
| 1B0Y | mutant h42q high-potential iron protein                                 | 7.777 | Cys63  |
| 1HZE | riboflavin synthase alpha chain                                         | 7.786 | Cys47  |
| 1GVP | gene v protein                                                          | 7.842 | Cys33  |
| 1PFS | pf3 single-stranded dna binding protein                                 | 7.859 | Cys40  |
| 1FRE | nuclear factor xnf7                                                     | 7.901 | Cys17  |
| 1BOR | replication protein a                                                   | 7.921 | Cys24  |
| 1GD0 | macrophage migration inhibitory factor                                  | 7.924 | Cys80  |
| 2SXL | sex-lethal protein                                                      | 7.931 | Cys33  |
| 1AVO | 11s regulator                                                           | 7.974 | Cys22  |
| 1ISU | high potential iron sulfur protein                                      | 7.999 | Cys55  |
| 1BL1 | parathyroid hormone receptor                                            | 8     | Cys31  |
| 1ISU | high potential iron sulfur protein                                      | 8.05  | Cys25  |
| 1H6W | bacteriophage t4 short tail fibre                                       | 8.108 | Cys362 |

|      |                                                                         |       |        |
|------|-------------------------------------------------------------------------|-------|--------|
| 1DXG | desulforedoxin                                                          | 8.117 | Cys12  |
| 1CHC | c3hc4 domain                                                            | 8.219 | Cys11  |
| 1GMM | cbm6                                                                    | 8.19  | Cys100 |
| 1FS1 | cyclin a/cdk2-associated p45                                            | 8.152 | Cys123 |
| 1FS1 | cyclin a/cdk2-associated p19                                            | 8.152 | Cys123 |
| 1C75 | cytochrome c-553                                                        | 8.267 | Cys32  |
| 1KWA | hcask/lin-2 protein pdz domain                                          | 8.235 | Cys513 |
| 1COO | rna polymerase alpha subunit                                            | 8.239 | Cys269 |
| 1GD0 | macrophage migration inhibitory factor                                  | 8.283 | Cys56  |
| 1EWI | replication protein a                                                   | 8.287 | Cys77  |
| 1CHC | c3hc4 domain                                                            | 8.343 | Cys32  |
| 1YCQ | mdm2                                                                    | 8.356 | Cys73  |
| 1RB9 | rubredoxin                                                              | 8.387 | Cys9   |
| 1CHC | c3hc4 domain                                                            | 8.549 | Cys8   |
| 1GCQ | growth factor receptor-bound protein 2                                  | 8.409 | Cys198 |
| 1H6W | bacteriophage t4 short tail fibre                                       | 8.509 | Cys372 |
| 1ISU | high potential iron sulfur                                              | 8.651 | Cys22  |
| 1K5J | nucleoplasmin core                                                      | 8.671 | Cys21  |
| 2AF8 | actinorhodin polyketide synthase acyl carrier protein                   | 8.678 | Cys17  |
| 1JFI | transcription regulator nc2 alpha chain                                 | 8.693 | Cys73  |
| 1DXG | desulforedoxin                                                          | 8.721 | Cys29  |
| 1BDO | acetyl-coa carboxylase                                                  | 8.713 | Cys116 |
| 1A1Z | fadd; death domain                                                      | 8.725 | Cys27  |
| 1EWI | replication protein a                                                   | 8.734 | Cys75  |
| 1LFB | liver transcription factor (lfb1)                                       | 8.736 | Cys51  |
| 1VFY | phosphatidylinositol-3-phosphate binding fyve domain of vps27p protein  | 8.74  | Cys195 |
| 1GD0 | macrophage migration inhibitory factor                                  | 8.786 | Cys59  |
| 2AVI | avidin                                                                  | 8.83  | Cys83  |
| 1JYA | yope regulator                                                          | 8.852 | Cys36  |
| 1HFI | factor h                                                                | 8.879 | Cys36  |
| 1RB9 | rubredoxin                                                              | 8.907 | Cys42  |
| 1EMV | immunity protein im9                                                    | 9.024 | Cys23  |
| 1EMV | immunity protein im9                                                    | 9.024 | Cys23  |
| 1B0Y | mutant h42q high-potential iron protein                                 | 9.135 | Cys43  |
| 1LFB | liver transcription factor (lfb1)                                       | 9.139 | Cys46  |
| 1DFE | l36 ribosomal protein                                                   | 9.207 | Cys27  |
| 1PTQ | protein kinase c delta type                                             | 9.151 | Cys264 |
| 1ISU | high potential iron sulfur protein                                      | 9.212 | Cys40  |
| 1RB9 | rubredoxin                                                              | 9.323 | Cys39  |
| 1TIT | titin, i27                                                              | 9.328 | Cys63  |
| 1B0Y | mutant h42q high-potential iron protein                                 | 9.342 | Cys46  |
| 1BOR | replication protein a                                                   | 9.439 | Cys29  |
| 1BOR | replication protein a                                                   | 9.474 | Cys32  |
| 1D3B | small nuclear ribonucleoprotein sm d3                                   | 9.548 | Cys20  |
| 1VFY | phosphatidylinositol-3-phosphate binding (fyve domain of protein vps27) | 9.552 | Cys176 |
| 1ABV | delta subunit of the f1f0-atp synthase                                  | 9.595 | Cys64  |

|      |                                                                         |        |        |
|------|-------------------------------------------------------------------------|--------|--------|
| 1FRE | nuclear factor xnf7                                                     | 9.928  | Cys25  |
| 1CHC | c3hc4 domain                                                            | 10.145 | Cys29  |
| 1VFY | phosphatidylinositol-3-phosphate binding (fyve domain of protein vps27) | 10.189 | Cys222 |
| 1BOR | replication protein a                                                   | 10.525 | Cys40  |
| 2FDN | ferredoxin                                                              | 10.627 | Cys43  |
| 1D3B | small nuclear ribonucleoprotein sm d3                                   | 10.811 | Cys41  |
| 1CHC | c3hc4 domain                                                            | 11.08  | Cys24  |
| 2FDN | ferredoxin                                                              | 11.21  | Cys14  |
| 1VFY | phosphatidylinositol-3-phosphate binding (fyve domain of protein vps27) | 12.158 | Cys225 |
| 1BOR | replication protein a                                                   | 12.171 | Cys9   |
| 2AVI | avidin                                                                  | 12.23  | Cys4   |
| 1DXG | desulfiredoxin                                                          | 13.162 | Cys9   |
| 1RB9 | rubredoxin                                                              | 13.59  | Cys6   |
| 1HDP | oct-2 pou homeodomain                                                   | 14.702 | Cys62  |
| 1HFI | factor h                                                                | 18.029 | Cys50  |
